# Supplementary material for: Regulated crystallization with minimized degradation for pure-red lead-free perovskite light-emitting diodes
Source: Royal Society of Chemistry journal article supplement (doi:10.1039/d3tc01743e), 2023-01-01
Supplement: d3tc01743e1.pdf [file d3tc01743e1.pdf]

## Supporting Information

### Regulated Crystallization with Minimized Degradation for Pure-Red Lead-Free Perovskite Light-Emitting Diodes

Zong-Guang Ma,<sup>a</sup> Yang Shen,<sup>a,\*</sup> Kai Zhang,<sup>b</sup> Long-Xue Cao,<sup>b</sup> Hao Ren,<sup>a</sup> Wei-Shuo Chen,<sup>a</sup> Huai-Xin Wei,<sup>c</sup> Yan-Qing Li,<sup>d,\*</sup> Satoshi Kera,<sup>e</sup> and Jian-Xin Tang<sup>a,b,\*</sup>

<sup>a</sup> *Jiangsu Key Laboratory for Carbon-Based Functional Materials & Devices, Institute of Functional Nano & Soft Materials (FUNSOM), Soochow University, Suzhou, Jiangsu 215123 (P. R. China)*

<sup>b</sup> *Macao Institute of Materials Science and Engineering (MIMSE), Faculty of Innovation Engineering (FIE), Macau University of Science and Technology, Taipa, Macao 999078 (P. R. China)*

<sup>c</sup> *School of Chemistry and Life Sciences, Suzhou University of Science and Technology, Suzhou, Jiangsu 215009 (P. R. China)*

<sup>d</sup> *School of Physics and Electronic Science, East China Normal University, Shanghai 200062 (P. R. China)*

<sup>e</sup> *Institute for Molecular Science, National Institutes of Natural Sciences, Myodaiji, Okazaki 444-8585 (Japan)*

E-mail: [20204014038@stu.suda.edu.cn](mailto:20204014038@stu.suda.edu.cn) (Y. Shen), [yqli@phy.ecnu.edu.cn](mailto:yqli@phy.ecnu.edu.cn) (Y.-Q. Li), [jxtang@suda.edu.cn](mailto:jxtang@suda.edu.cn) (J.-X. Tang)



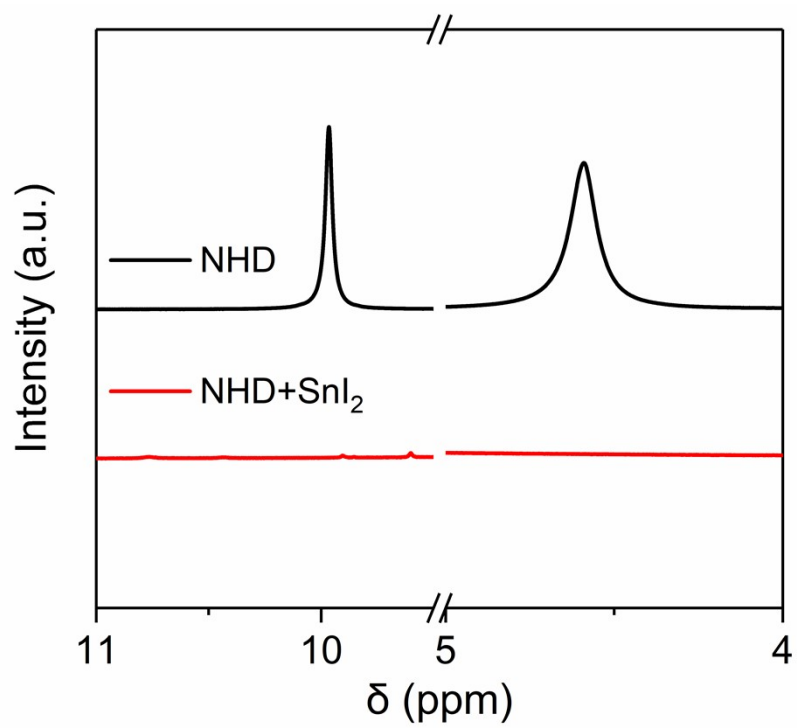

**Figure S2.** High-resolution  $^1\text{H}$  NMR spectra of NHD and NHD/SnI<sub>2</sub> mixture.

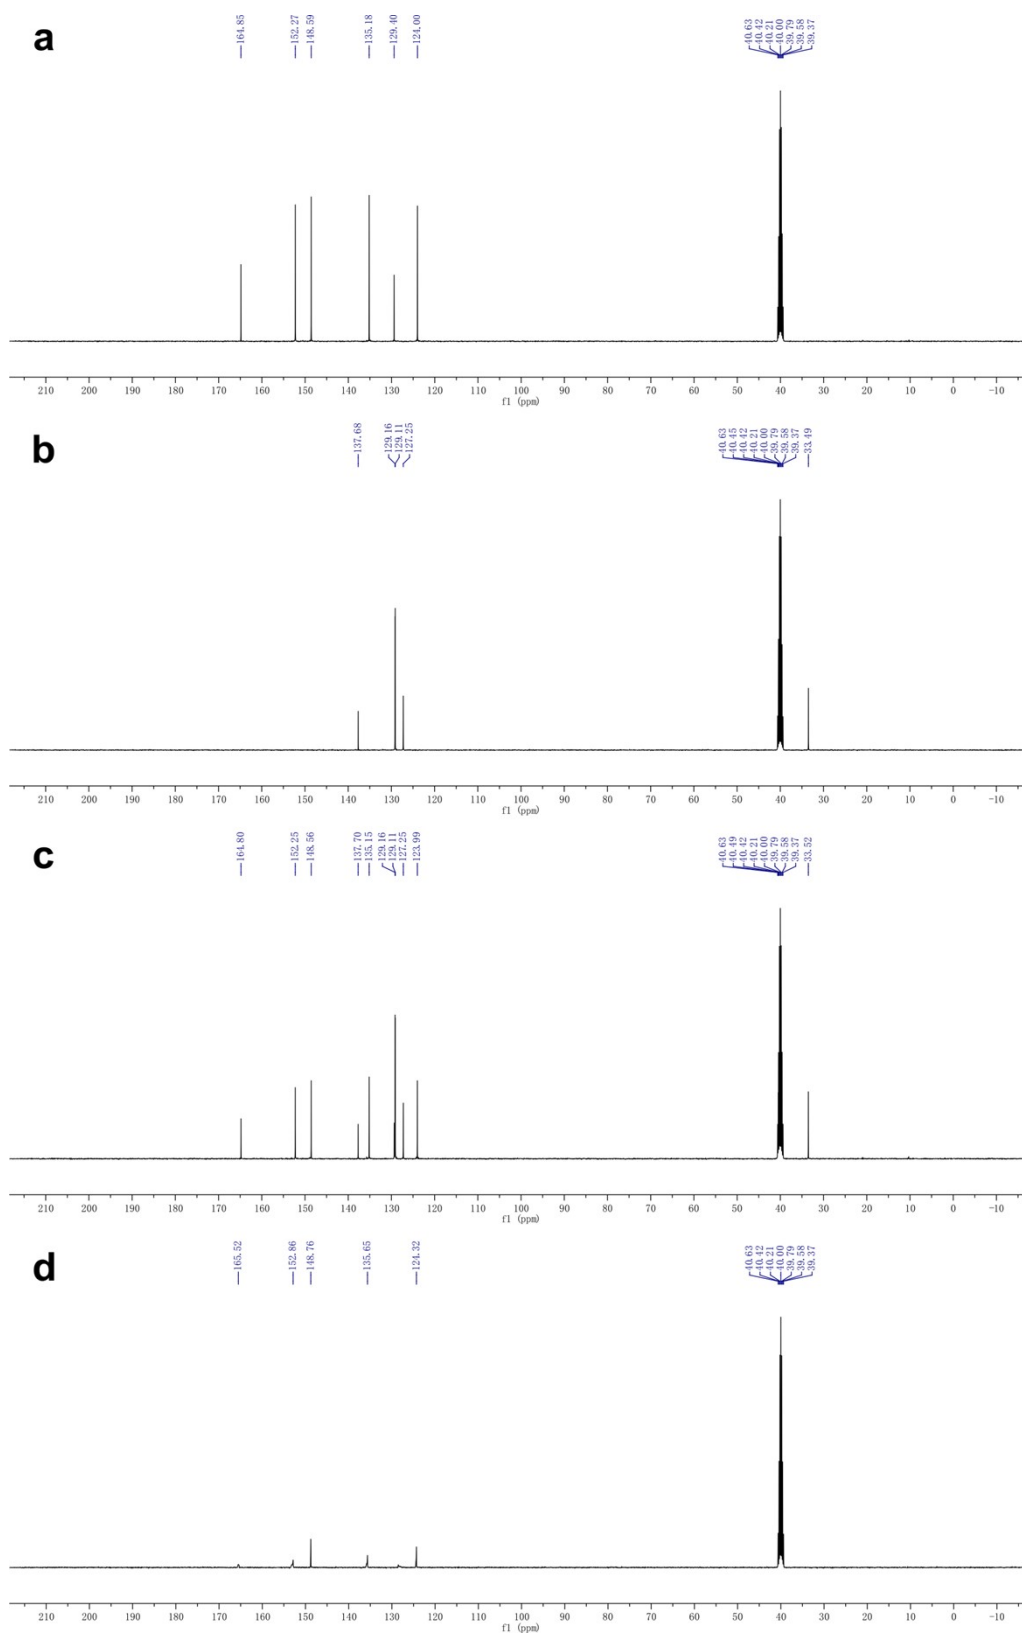

**Figure S3.**  $^{13}\text{C}$  NMR spectra of (a) NHD, (b) PEAI, (c) PEAI/NHD mixture, and (d)  $\text{SnI}_2/\text{NHD}$  mixture.

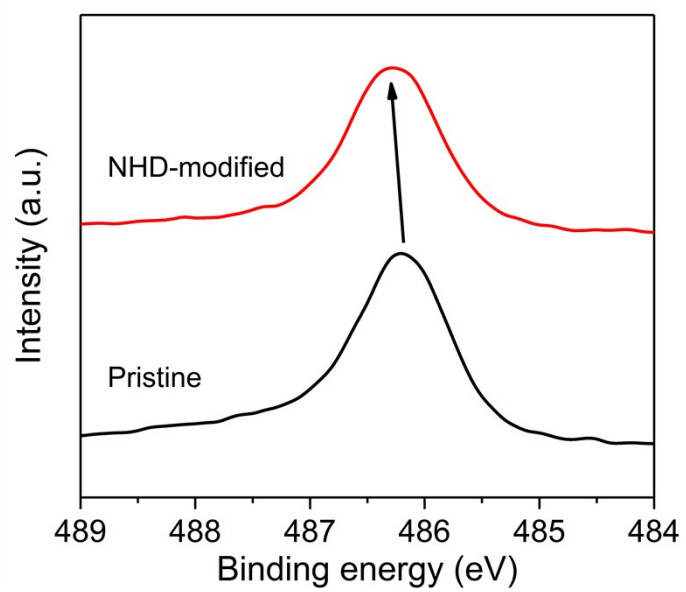

**Figure S4.** XPS spectra from the Sn 3d core levels in PEA<sub>2</sub>SnI<sub>4</sub> perovskite films with and without NHD.

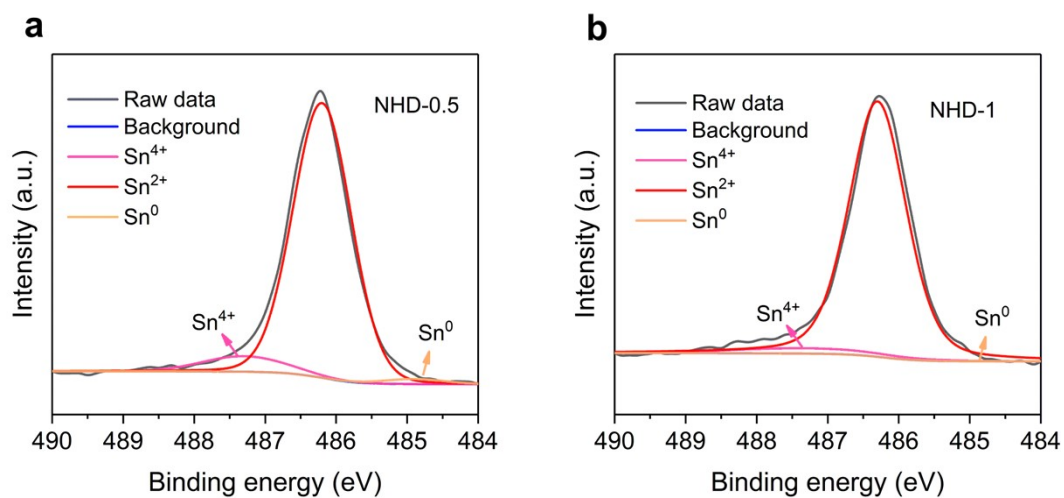

**Figure S5.** Fitting analysis of the XPS spectra from the Sn  $3d$  core levels  $\text{PEA}_2\text{SnI}_4$  perovskite films with NHD at concentrations of (a) 0.5 and (b) 1  $\text{mg mL}^{-1}$ .

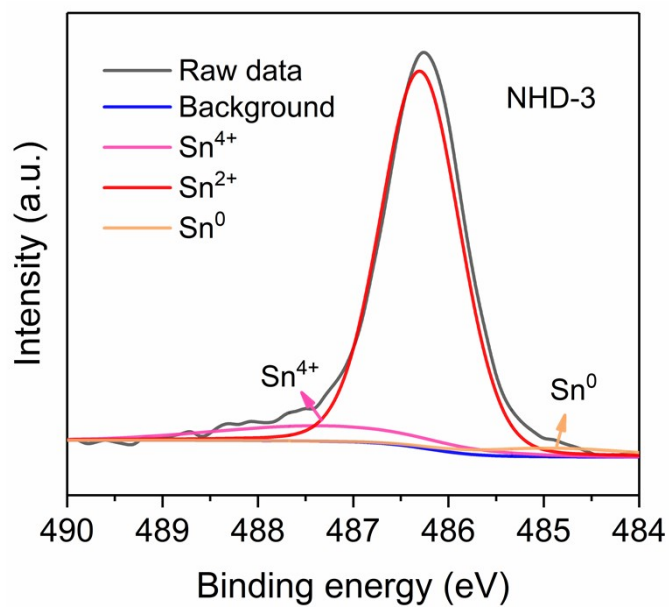

**Figure S6.** Fitting analysis of the XPS spectrum from the Sn  $3d$  core level  $\text{PEA}_2\text{SnI}_4$  perovskite films with NHD at a concentration of  $3 \text{ mg mL}^{-1}$ .

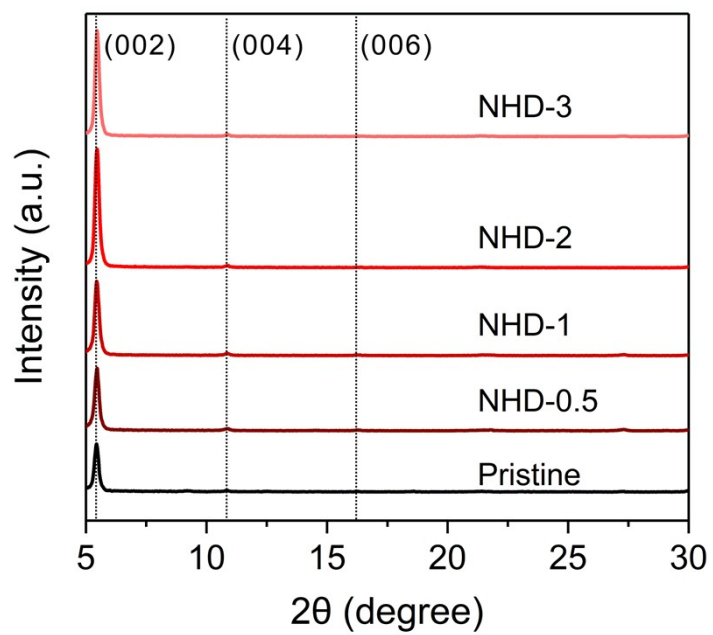

**Figure S7.** XRD patterns of perovskite films modified with different concentrations of NHD.



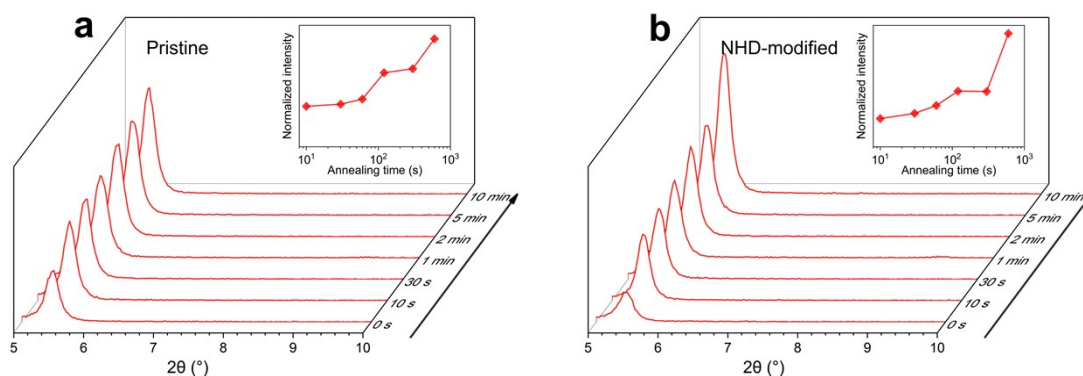

**Figure S8.** Crystallization kinetics of perovskite films. In situ XRD patterns with increasing annealing time of perovskite films (a) without and (b) with ( $2 \text{ mg mL}^{-1}$ ) NHD modification. The inserts are the normalized time-revolved diffraction intensities of the lattice plane (002) as obtained in (a) and (b).

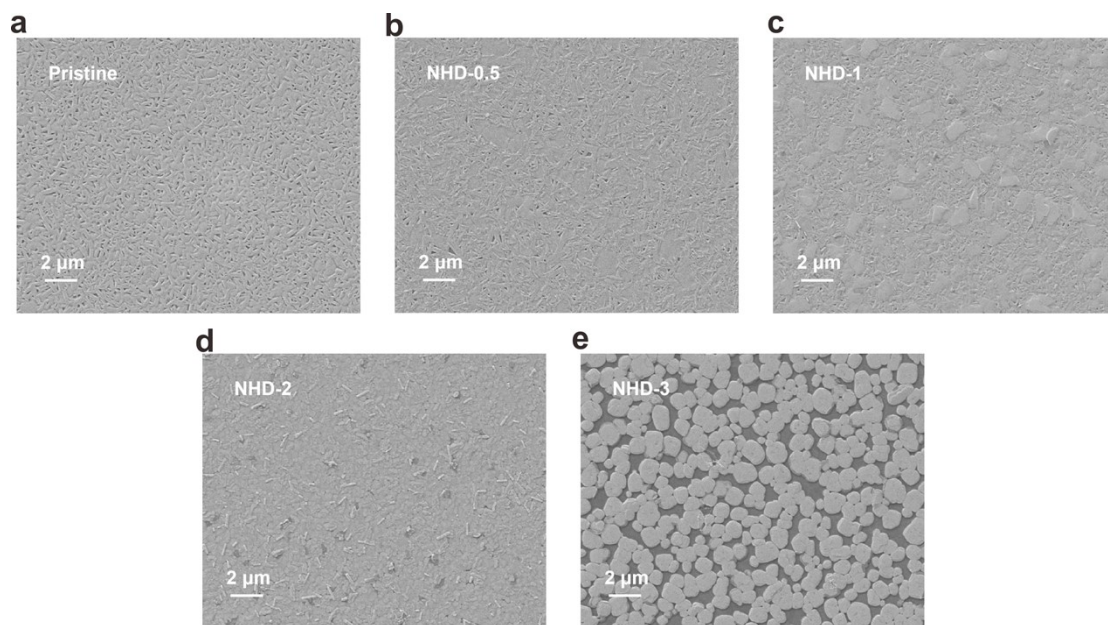

**Figure S9.** Top-view SEM images of PEA<sub>2</sub>SnI<sub>4</sub> films (a) without and with NHD at concentrations of (b) 0.5, (c) 1, (d) 2, and (e) 3 mg mL<sup>-1</sup>.

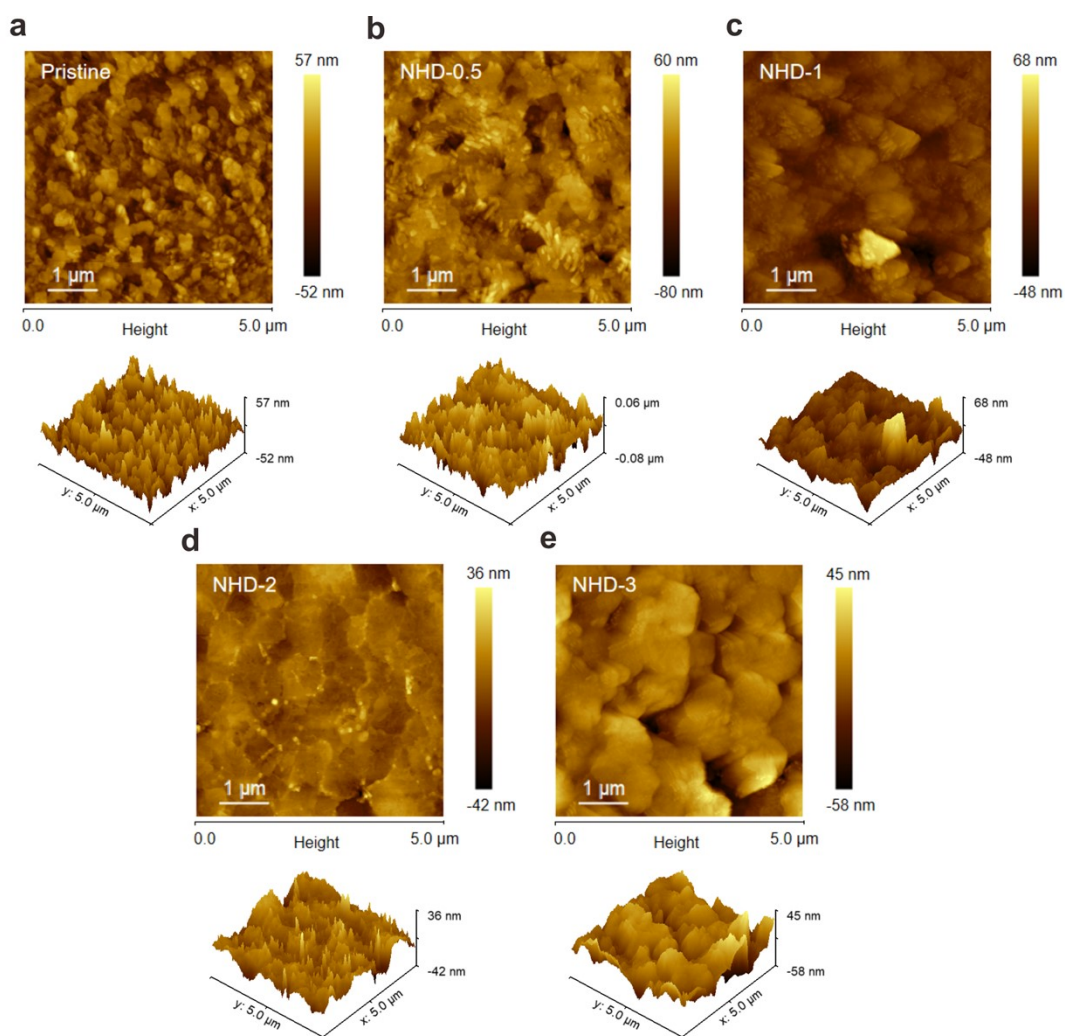

**Figure S10.** Height-mode AFM images of  $\text{PEA}_2\text{SnI}_4$  films (a) without and with NHD at concentrations of (b) 0.5, (c) 1, (d) 2, and (e) 3  $\text{mg mL}^{-1}$ , the RMS values of which are 10.7, 12.6, 8.0, 4.86, and 9.83 nm, respectively.

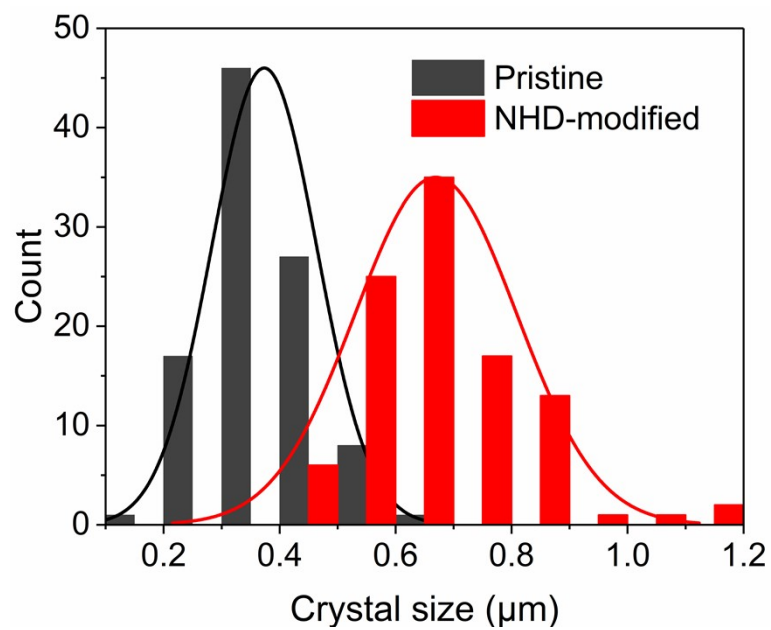

**Figure S11.** Histogram of grain size distribution with and without NHD modification.

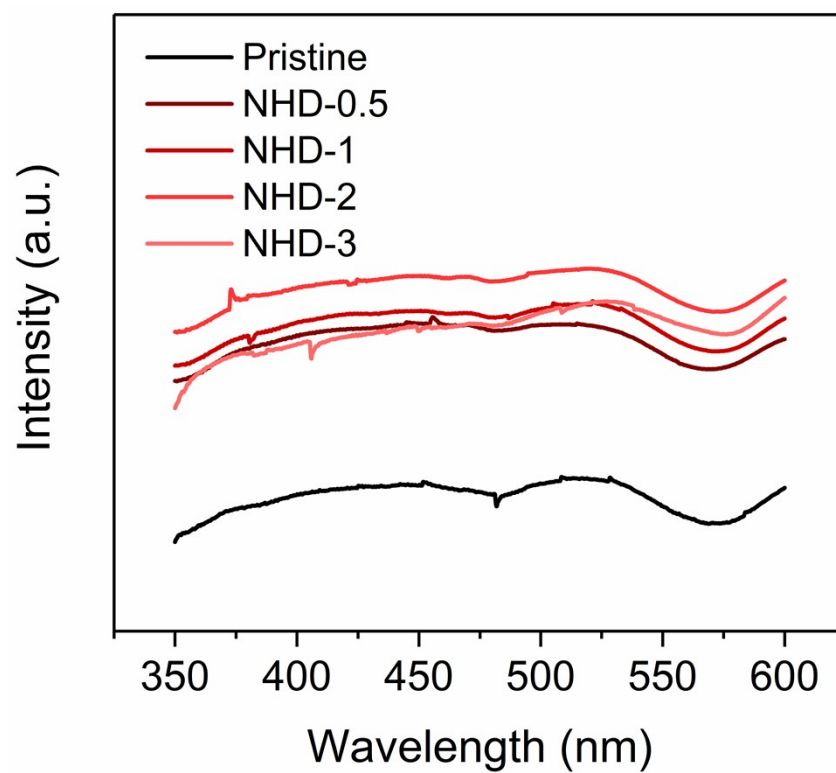

**Figure S12.** PLE characteristics of perovskite films with different doping concentration of NHD.

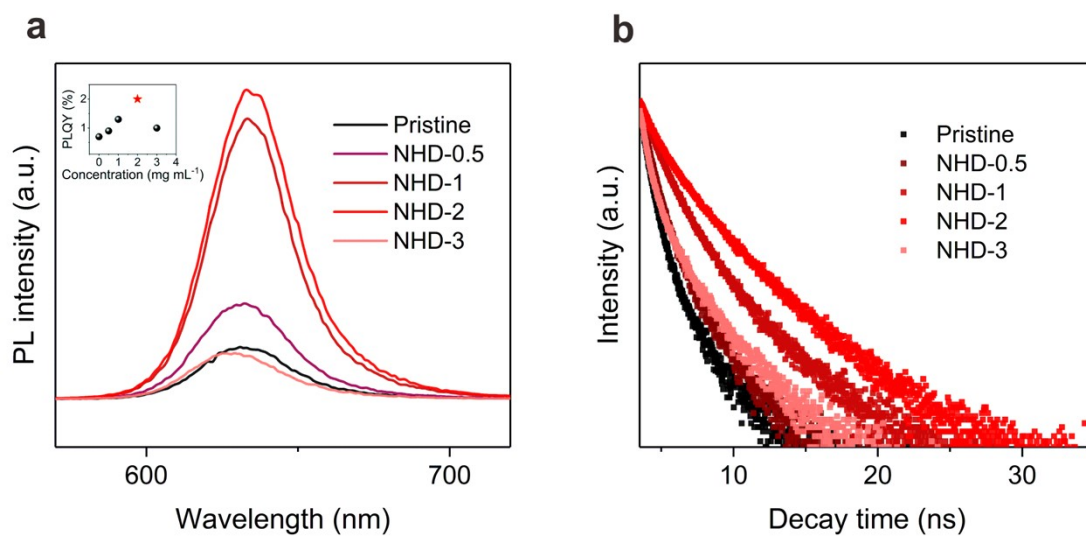

**Figure S13.** PL characteristics of perovskite films. (a) PL and (b) TRPL spectra of PEA<sub>2</sub>SnI<sub>4</sub> perovskite films with different doping concentrations of NHD. The inset is PLQY of films without and with different concentrations of NHD.

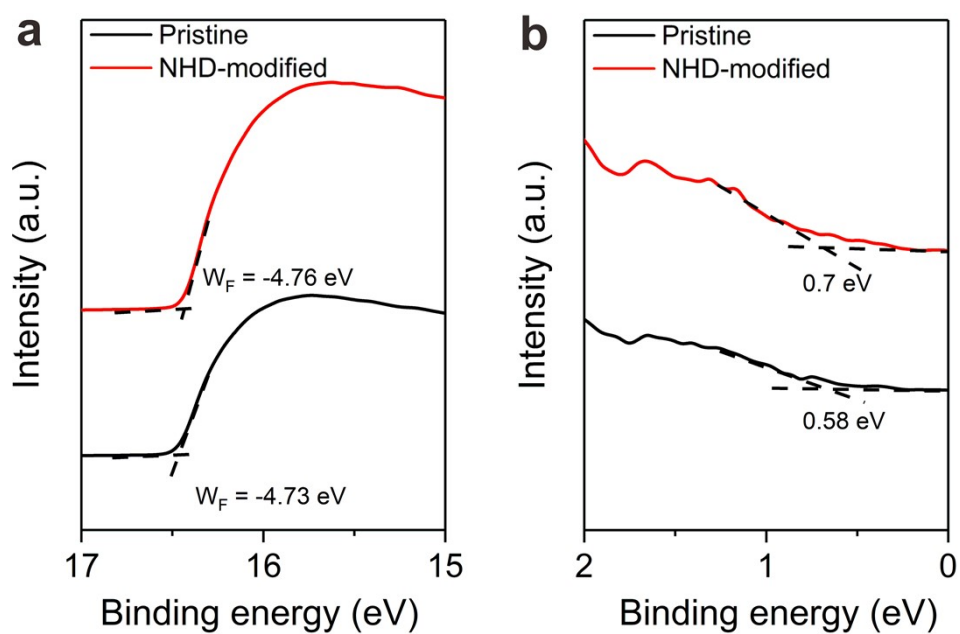

**Figure S14.** Energy-level measurement of PEA<sub>2</sub>SnI<sub>4</sub> films. (a) Secondary-electron cutoff and (b) onset regions of the UPS spectra of pristine and NHD-modified perovskite films.

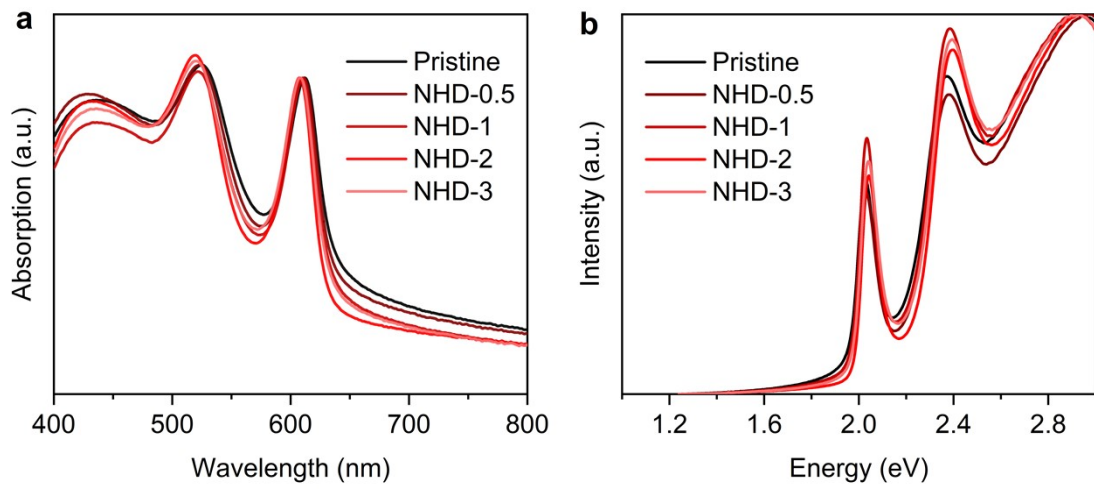

**Figure S15.** Absorption spectra and bandgap measurement of perovskite films. (a) Absorption spectra of PEA<sub>2</sub>SnI<sub>4</sub> films with different doping concentrations of NHD. (b) Tauc plot analysis of the absorption measurement.



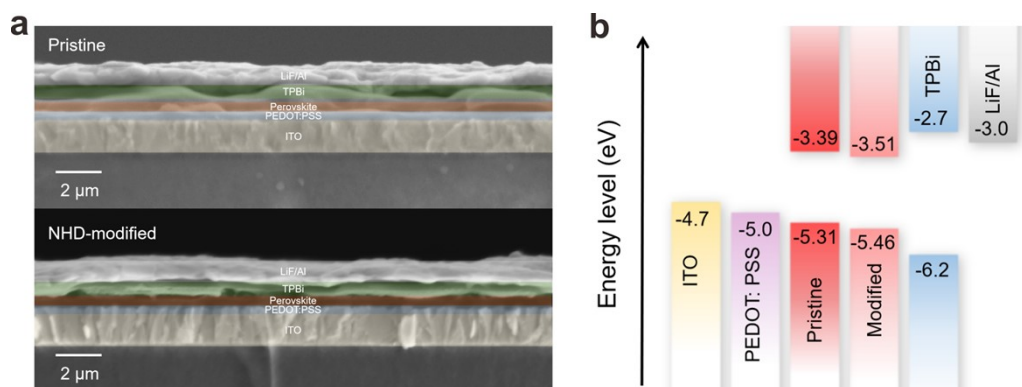

**Figure S16.** (a) Cross-section SEM image of devices with and without NHD modified.

(b) Schematic energy-level alignment of pristine and NHD-modified devices.

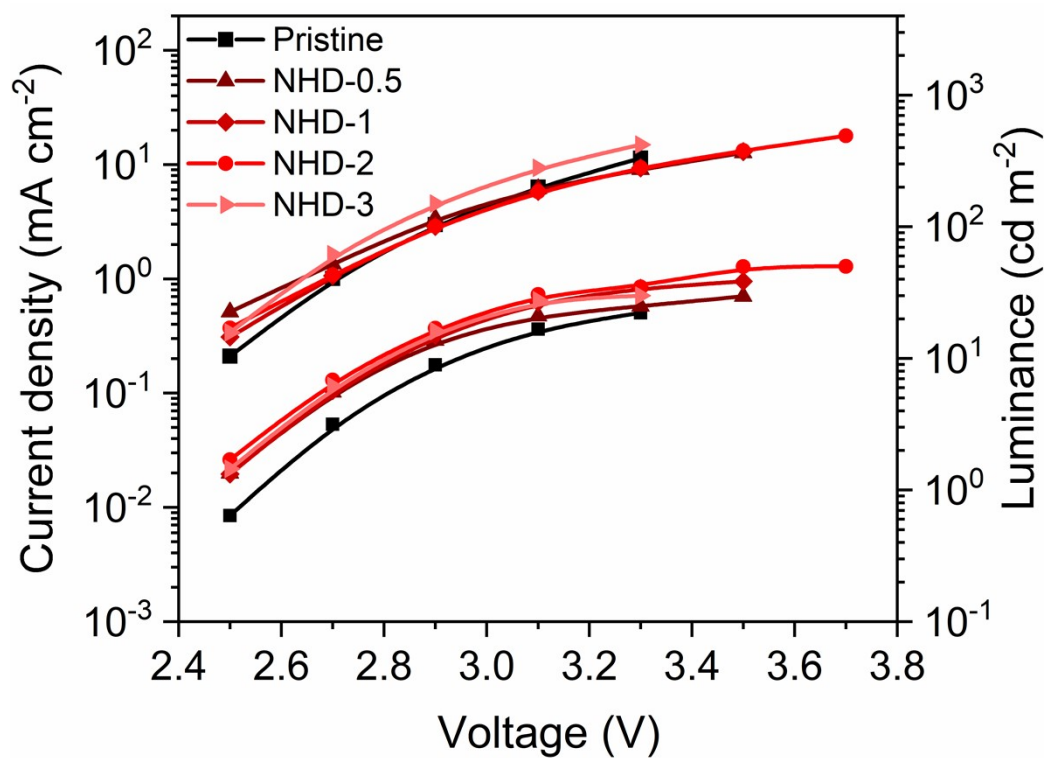

**Figure S17.** *J-V-L* curves of devices with different doping concentration of NHD.

**Table S1.** The fitted TRPL lifetimes of perovskite films.

| perovskites | $\tau_{ave}$ | $\tau_1$ | $\tau_2$ |
|-------------|--------------|----------|----------|
|             | (ns)         | (ns)     | (ns)     |
| pristine    | 0.74         | 0.14     | 0.68     |
| NHD-0.5     | 0.91         | 0.55     | 1.25     |
| NHD-1       | 2.32         | 0.83     | 2.71     |
| NHD-2       | 3.66         | 0.93     | 4.77     |
| NHD-3       | 0.88         | 0.50     | 1.31     |

**Table S2.** Performance Parameters of pristine and NHD-modified devices.

| Devices      | Peak<br>(nm) | CIE coordinates | FWHM<br>(nm) | $L_{\max}$<br>(cd m <sup>-2</sup> ) | $EQE_{\max}$<br>(%) | CE<br>(cd A <sup>-1</sup> ) |
|--------------|--------------|-----------------|--------------|-------------------------------------|---------------------|-----------------------------|
| Pristine     | 628          | (0.69, 0.30)    | 30           | 22                                  | 0.30                | 0.31                        |
| NHD-modified | 628          | (0.69, 0.30)    | 30           | 50                                  | 0.86                | 1.1                         |
